# Supplementary material for: Frequent cross-resistance to rilpivirine among subtype C HIV-1 from first-line antiretroviral therapy failures in South Africa
Source: PubMed Central journal article supplement (PMC5890541; doi:10.1177/2040206618762985), 2018-03-22
Supplement: Supplementary_table.pdf [file Supplementary_table.pdf]

**Supplementary Table S1. Rilpivirine IC<sub>50</sub>, Fold-Change and Resistance Category, and Reverse Transcriptase Genotype for Each Plasma-Derived HIV-1 from Individuals on Failing First-Line Non-Nucleoside Reverse Transcriptase Inhibitor-Based Antiretroviral Therapy**

| Sample | FC <sup>a</sup> | IC <sub>50</sub><br>(ng/mL) | Protein<br>Adjusted<br>IC <sub>90</sub> | Major NRTI <sup>b</sup>          | Major NNRTI <sup>b</sup>   |
|--------|-----------------|-----------------------------|-----------------------------------------|----------------------------------|----------------------------|
| 1      | 0.36            | 0.04                        | 1.6                                     | A62AV,L74IL,M184V                | K101E,V106M,E138A,G190A    |
| 2      | 0.58            | 0.07                        | 2.6                                     | D67N,K70R,M184V,T215Y,K219Q      | V106M,F227L,N348I          |
| 3      | 0.74            | 0.09                        | 3.3                                     | K65R,L74I,Y115F,M184V            | K103N,V106M                |
| 4      | 0.76            | 0.09                        | 3.3                                     | D67N, K70E, M184V                | V106M, G190A, H221Y, F227L |
| 5      | 0.84            | 0.10                        | 3.7                                     | None                             | V106MV,G190AG              |
| 6      | 0.87            | 0.10                        | 3.8                                     | None                             | K103N                      |
| 7      | 0.95            | 0.11                        | 4.2                                     | K70E,L74IL,Y115F,M184V           | A98G,V106M,Y188C           |
| 8      | 1.0             | 0.12                        | 4.3                                     | None                             | K103N                      |
| 9      | 1.0             | 0.12                        | 4.4                                     | T69NT                            | K103N                      |
| 10     | 1.1             | 0.13                        | 4.8                                     | M41L,D67N,V75I,M184V,L210W,T215Y | K103N,V106M,F227FL         |
| 11     | 1.2             | 0.14                        | 5.3                                     | V75M,M184V                       | V106M,E138A,G190A          |
| 12     | 1.2             | 0.15                        | 5.5                                     | M41L,M184V,T215F                 | V106M,G190A                |
| 13     | 1.2             | 0.15                        | 5.5                                     | M184V                            | K103N,N348I                |
| 14     | 1.4             | 0.16                        | 6.0                                     | A62V,K65R,L74I,Y115F,M184V       | V106M,Y188C,G190A          |
| 15     | 1.5             | 0.18                        | 6.7                                     | A62V,K65R,M184V                  | K103S,V106M                |
| 16     | 1.6             | 0.20                        | 7.2                                     | A62V,K65R,L74IL,M184V            | K103N,G190A                |
| 17     | 1.6             | 0.20                        | 7.3                                     | M184V                            | V106M,G190A,H221Y          |
| 18     | 1.6             | 0.20                        | 7.3                                     | M184V                            | K101HKNQ,K103N,G190A       |
| 19     | 1.7             | 0.21                        | 7.6                                     | L74V,Y115F,M184V                 | K103Q,V106M,Y188F,F227L    |
| 20     | 1.8             | 0.22                        | 8.0                                     | K65R,M184V                       | V106M,Y188C                |
| 21     | 1.8             | 0.22                        | 8.1                                     | K65R,M184V                       | V106M,V179D                |
| 22     | 1.9             | 0.22                        | 8.3                                     | M41L,D67N,K70E,M184V,T215F       | K101H,V106M,G190A,F227L    |
| 23     | 2.0             | 0.24                        | 8.7                                     | K65R,M184V                       | V106M,V179D,M230L          |
| 24     | 2.0             | 0.24                        | 8.8                                     | L74IL,Y115F,F116FY,M184V,K219EK  | V106M,Y188C                |

|    |     |      |     |                                         |                                       |
|----|-----|------|-----|-----------------------------------------|---------------------------------------|
| 25 | 2.0 | 0.24 | 8.9 | L74I,M184V                              | K103N                                 |
| 26 | 2.1 | 0.25 | 9.1 | D67N,T69N,K70R,L74IL,M184V,T215IV,K219E | K103N,P225H                           |
| 27 | 2.1 | 0.25 | 9.1 | K65R,D67G,Y115F,M184V,K219E             | V106M,Y181C,G190A                     |
| 28 | 2.1 | 0.25 | 9.2 | M41L,D67N,K70R,L74I,M184V,T215Y,K219Q   | K101E,G190A,P225H                     |
| 29 | 2.2 | 0.26 | 9.6 | L74IL,M184V                             | K103S,V106M                           |
| 30 | 2.2 | 0.26 | 9.6 | K65R,L74I,M184V,K219E                   | K103N,V106M                           |
| 31 | 2.2 | 0.27 | 9.8 | K65R,L74I,Y115F,M184V,K219E             | V90I,V106M,E138G,V179E,F227L          |
| 32 | 2.5 | 0.30 | 11  | M184V                                   | K103N,N348I                           |
| 33 | 2.6 | 0.31 | 11  | M184V,T215F                             | A98G,K103N,V108I                      |
| 34 | 2.6 | 0.31 | 12  | D67N,K70R,M184V,K219Q                   | K103N,V106M,E138AEKT,N348I            |
| 35 | 2.7 | 0.32 | 12  | M41LM,K65R,M184V                        | V106M,E138A,V179D                     |
| 36 | 2.8 | 0.33 | 12  | M41L,D67N,M184V,T215F,K219W             | A98G,K101E,G190A                      |
| 37 | 2.8 | 0.33 | 12  | M184V                                   | K103N,E138A,P225H                     |
| 38 | 2.9 | 0.34 | 13  | M184V                                   | K103N,V106M,E138Q,N348IN              |
| 39 | 2.9 | 0.35 | 13  | M41L,D67N,T69D,K70R,M184V,T215F,K219Q   | K101H,V106M,G190A,F227L               |
| 40 | 3.1 | 0.37 | 14  | None                                    | K101EK,K103KN,V106M,V108IV,G190AG     |
| 41 | 3.2 | 0.38 | 14  | T69N,K70R,M184V                         | V106M,V179D                           |
| 42 | 3.3 | 0.39 | 14  | D67N,K70G,M184V,K219Q                   | K103NS,V106M,G190A,N348I              |
| 43 | 3.4 | 0.40 | 15  | A62AV,K65R,M184I                        | V90I,A98G,K103N,Y181C,G190A           |
| 44 | 3.5 | 0.41 | 15  | M184MV                                  | K103N,E138A,P225H                     |
| 45 | 3.5 | 0.42 | 15  | M41L,L74I,M184V,T215F                   | K103N,V108I                           |
| 46 | 3.5 | 0.42 | 15  | L74V,V75L,M184V,K219N                   | G190E                                 |
| 47 | 3.8 | 0.45 | 17  | M41LM,M184V,T215Y                       | K103N,V108I                           |
| 48 | 4.0 | 0.47 | 18  | K65R,Y115F,M184V                        | L100M,K101EK,V106M,E138K,V179DV,F227L |
| 49 | 4.0 | 0.48 | 18  | K70E,Y115F,M184V                        | V106M,V179D                           |
| 50 | 4.1 | 0.49 | 18  | L74IL,M184V,T215NSTY                    | K101EK,K103N,V108IV,P225H,M230LM      |
| 51 | 4.3 | 0.52 | 19  | L74V,Y115F,M184V                        | K103S,G190A,Y318F                     |
| 52 | 4.6 | 0.54 | 20  | K70EK,L74V,M184V                        | L100I,K103N,V106MV                    |
| 53 | 4.6 | 0.55 | 20  | K65R,L74IL,Y115F,M184V                  | K103N,P225H                           |
| 54 | 4.9 | 0.59 | 22  | A62AV,K65KR,K70EK,M184V                 | K103N,Y181C                           |

|    |     |      |     |                                          |                                                   |
|----|-----|------|-----|------------------------------------------|---------------------------------------------------|
| 55 | 5.1 | 0.61 | 22  | M41LM,V75M,M184V,T215Y                   | A98G,V106M,F227L                                  |
| 56 | 5.2 | 0.61 | 23  | M41L,D67N,T69D,K70R,M184V,T215F,K219Q    | K103N,V106M,E138A,F227L                           |
| 57 | 5.4 | 0.65 | 24  | L74V,M184V                               | V179D,Y188L,N348IT                                |
| 58 | 6.2 | 0.74 | 27  | M184V                                    | Y181C                                             |
| 59 | 6.2 | 0.74 | 27  | None                                     | K103N,E138EG,P225H                                |
| 60 | 6.5 | 0.77 | 28  | K219KR                                   | K103N,P225H                                       |
| 61 | 7.5 | 0.89 | 33  | M41L,K65R,T69V,K70T,M184V                | K101E,V106M,Y181C,G190A,H221Y,F227L               |
| 62 | 7.6 | 0.90 | 33  | M184V                                    | Y181C,N348IT                                      |
| 63 | 10  | 1.2  | 44  | K65R,L74IL,M184V                         | K103NS,V106MV,M230L                               |
| 64 | 10  | 1.2  | 45  | K65R                                     | V106M,V179D,Y181C                                 |
| 65 | 11  | 1.3  | 49  | V75M, F77L, M184V, T215Y                 | V106A, G190A, F227L                               |
| 66 | 13  | 1.5  | 57  | T69NT,K70KR,M184V                        | K103N,P225H,N348I                                 |
| 67 | 13  | 1.6  | 58  | K65R,M184V                               | L100I,K103N                                       |
| 68 | 14  | 1.7  | 61  | K70EK,M184V,T215FIST                     | V90IV,K103N,V108IV,Y181CY,G190AG,K238KT,N348IN    |
| 69 | 14  | 1.7  | 62  | D67N, K70E, V75T, M184V                  | A98AG, K103N, V106IM, V108IV, Y181C, G190A, H221Y |
| 70 | 15  | 1.7  | 64  | A62AV,V75IT,M184I                        | K103N,P225HP,M230L                                |
| 71 | 18  | 2.1  | 78  | K65R,M184V                               | V106M,E138A,V179D,M230L                           |
| 72 | 23  | 2.8  | 103 | K65R,T69 deletion                        | K101E,K103KN,E138AT,Y181C,G190AT                  |
| 73 | 25  | 3.0  | 109 | A62V,K65R,M184I                          | V106M,V179D,M230L                                 |
| 74 | 26  | 3.1  | 114 | M41L, V75I, M184V, T215Y                 | Y188L, H221Y, N348IN                              |
| 75 | 27  | 3.2  | 117 | M41L,T69AD,T215Y,K219KR                  | A98G,Y181C,G190S                                  |
| 76 | 27  | 3.2  | 118 | M41L, D67N, T69D, M184I, L210W, T215Y    | V90I, L100I, K103N                                |
| 77 | 30  | 3.6  | 132 | K65R,V75I,M184V,K219E                    | V90I,V108I,V179D,Y181C,G190A                      |
| 78 | 32  | 3.8  | 140 | K65R,M184V                               | L100I,K103N                                       |
| 79 | 33  | 3.9  | 145 | K65R,K70KT,M184V                         | A98G,K101E,V106I,V108IV,Y181C,G190A               |
| 80 | 33  | 4.0  | 148 | K65R,M184V                               | L100I,K103N                                       |
| 81 | 41  | 4.9  | 181 | M184V,K219E                              | L100I,K103N                                       |
| 82 | 44  | 5.2  | 193 | K65R,L74I,M184V                          | L100I,K103N                                       |
| 83 | 47  | 5.6  | 207 | K70KN,L74V,Y115F,M184V                   | A98G,Y181C,H221Y,Y318F                            |
| 84 | 48  | 5.7  | 211 | M41L,D67N,K70KNRS,L74I,M184V,T215F,K219Q | A98G,K103N,P225H,K238N                            |

|     |    |     |     |                                                |                                      |
|-----|----|-----|-----|------------------------------------------------|--------------------------------------|
| 85  | 51 | 6.1 | 224 | K65R,K70KT,L74IL,M184V,K219KQ                  | K103NS,V106M,M230L                   |
| 86  | 64 | 7.6 | 280 | L74V,M184V                                     | L100I,K103N,V108I,H221HY             |
| 87  | 67 | 8.0 | 295 | D67N, T69D, K70R, M184V, T215V, K219Q          | A98G, K103N, P225H                   |
| 88  | 72 | 8.6 | 318 | K65R, T69 deletion, K70KN, L74LV, Y115F, K219R | K101E, V106M, Y181C, G190A, H221Y    |
| 89  | 73 | 8.6 | 320 | None                                           | A98AG,K103N,V106MV,V179DINV,Y188FHLY |
| 90  | 77 | 9.2 | 339 | T69N,K70R,M184V,T215I,K219Q                    | A98G,K103N,V108I,M230L               |
| 91  | 77 | 9.2 | 339 | K70E,M184V                                     | L100I,K103N,V108IV,E138K,P225HP      |
| 92  | 77 | 9.2 | 339 | D67G,M184V                                     | L100IL,Y188L                         |
| 93  | 77 | 9.2 | 339 | M41L,D67N,K70KR,M184V,L210LW,T215Y,K219E       | A98G,V179DV,Y188L                    |
| 94  | 77 | 9.2 | 339 | K65R,V75M,M184I                                | K103N,V106M,M230L                    |
| 95  | 77 | 9.2 | 339 | D67N,K70R,M184V,T215FI,K219E                   | K103N,V108I,V179E,N348I              |
| 96  | 77 | 9.2 | 339 | K65R,T69 deletion                              | K103N,V179E,Y181C                    |
| 97  | 77 | 9.2 | 339 | K65R,K70KT,M184V                               | K103N,V179T,Y188L                    |
| 98  | 77 | 9.2 | 339 | K65R,L74V,M184V                                | L100I,K103N,M230L                    |
| 99  | 77 | 9.2 | 339 | A62AV,K65R,Y115FY,M184V                        | L100I,K103N                          |
| 100 | 77 | 9.2 | 339 | K65R,M184V,K219E                               | L100I,K103N,M230L,Y318F              |

<sup>a</sup> Fold-change resistance (FC) was calculated by dividing the IC<sub>50</sub> generated for each patient derived virus by a composite IC<sub>50</sub> from 12 treatment naïve patient derived viruses collected from the same geographical region.

<sup>b</sup> Genotypic information was obtained through HIVdb v7.0 (Stanford University). Major NRTI and NNRTI resistance mutations are reported directly as determined by HIVdb v7.0.
